# Supplementary material for: Capturing the Liquid-Crystalline Phase Transformation: Implications for Protein Targeting to Sterol Ester-Rich Lipid Droplets
Source: MDPI journal article supplement (doi:10.3390/membranes12100949), 2022-09-28

## Supplementary Material

### Capturing the liquid-crystalline phase transformation: Implications for protein targeting to sterol ester-rich lipid droplets

R. Jay Braun<sup>1</sup>, Jessica M.J. Swanson<sup>1\*</sup>

<sup>1</sup>. Department of Chemistry, University of Utah, Salt Lake City, Utah 84112-0850, USA \*Corresponding author:  
[j.swanson@utah.edu](mailto:j.swanson@utah.edu)

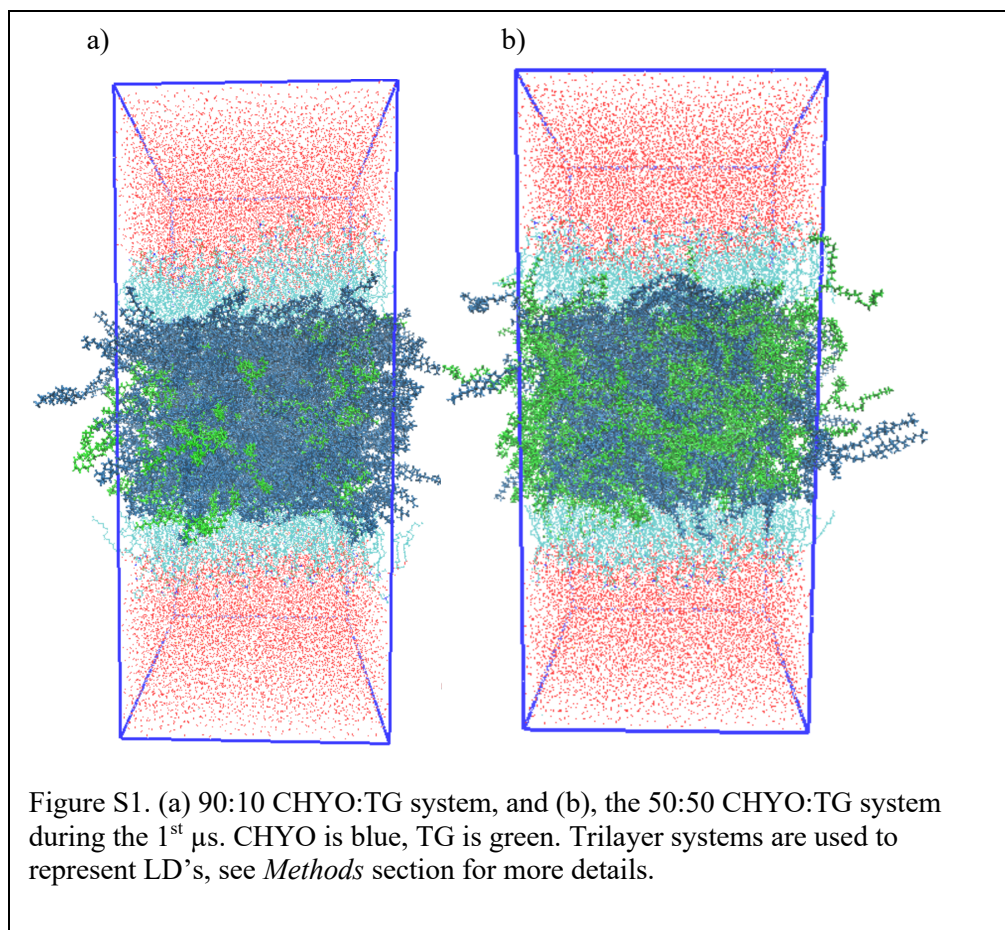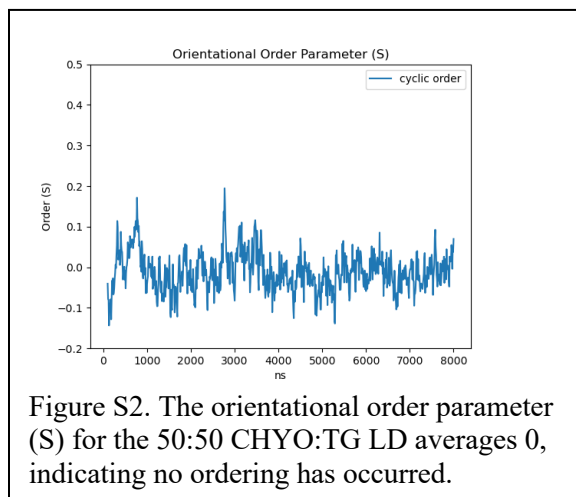

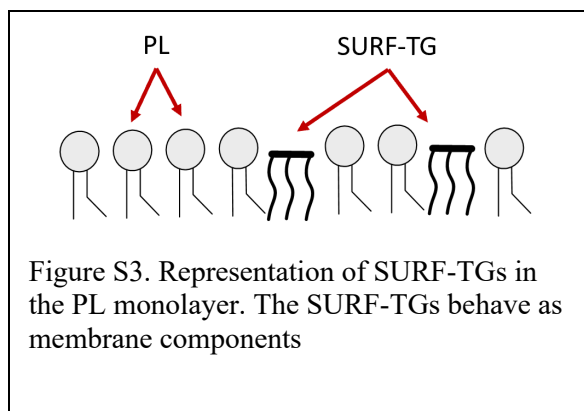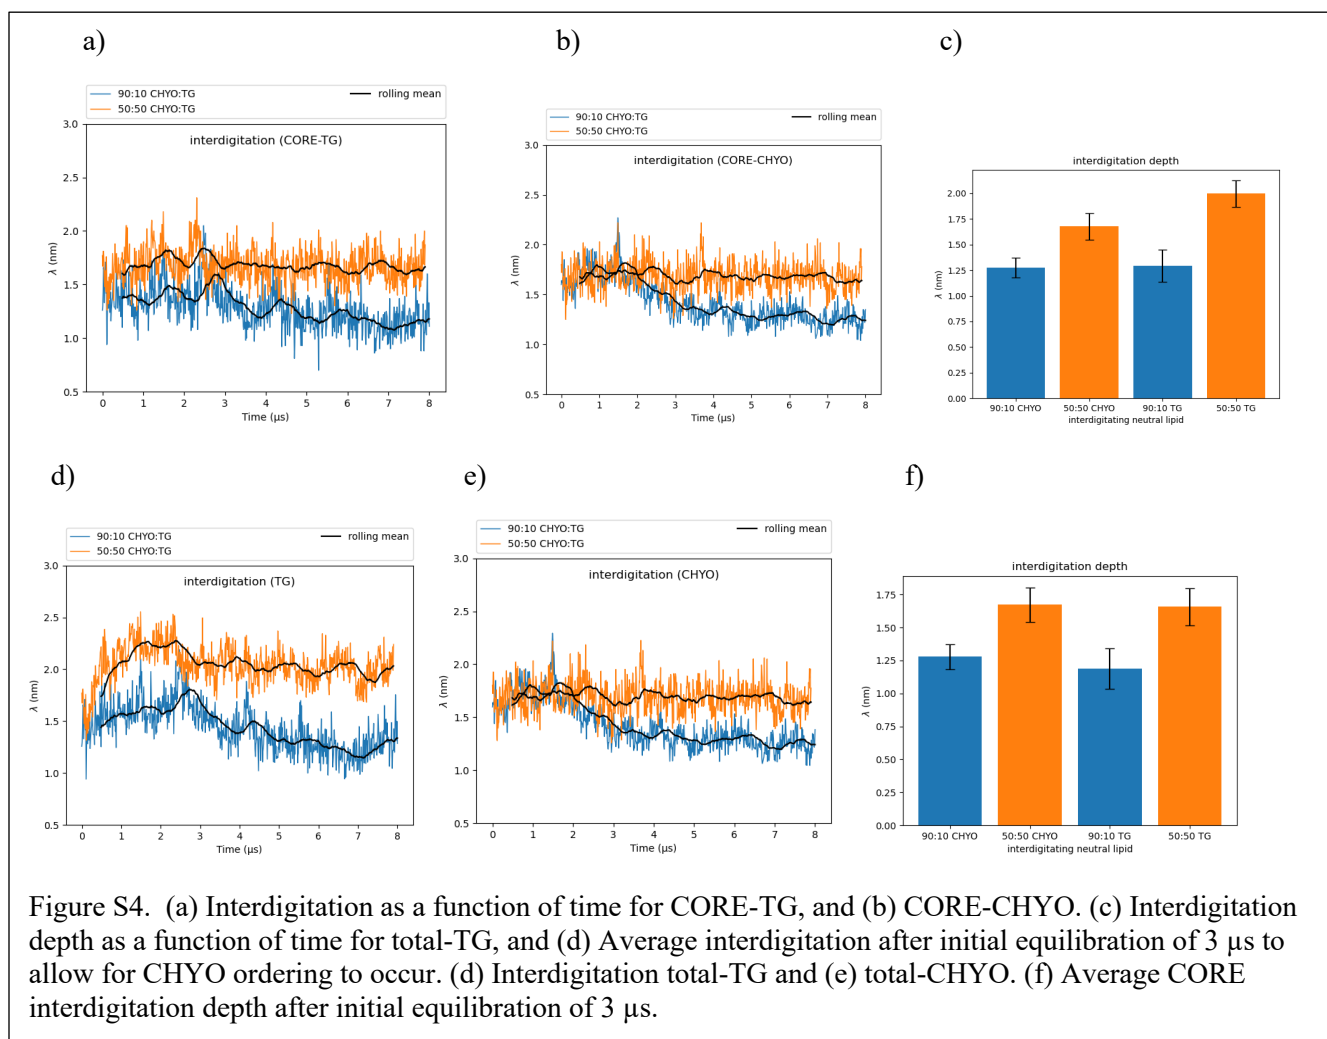

SI table S1. The average magnitude of interdigitation of neutral lipids for multiple LD species. The calculation were taken after 4  $\mu$ s to allow for equilibration

| LD type  | 90:10 CHYO:TG LD  | 50:50 CHYO:TG LD  | Pure TG LD  |
|----------|-------------------|-------------------|-------------|
| SURF-TG  | 0.130 $\pm$ 0.014 | 0.605 $\pm$ 0.039 | $\sim$ 1.27 |
| CORE-TG  | 1.188 $\pm$ 0.155 | 1.657 $\pm$ 0.139 | $\sim$ 1.83 |
| TG total | 1.294 $\pm$ 0.157 | 1.998 $\pm$ 0.127 | $\sim$ 2.42 |
| CHYO     | 1.278 $\pm$ 0.097 | 1.678 $\pm$ 0.129 |             |

**Standard errors SURF:** 90:10 TG: 0.001, 50:50 TG: 0.001

**Standard errors CORE:** 90:10 CHYO: 0.005, 50:50 CHYO: 0.008, 90:10 TG: 0.008, 50:50 TG: 0.007

**Standard errors total:** 90:10 CHYO: 0.005, 50:50 CHYO: 0.008, 90:10 TG: 0.008, 50:50 TG: 0.007

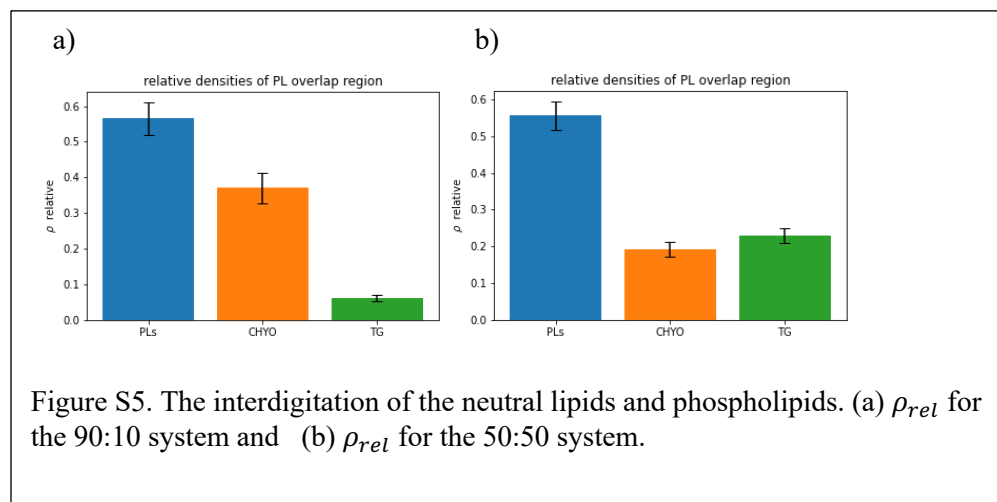

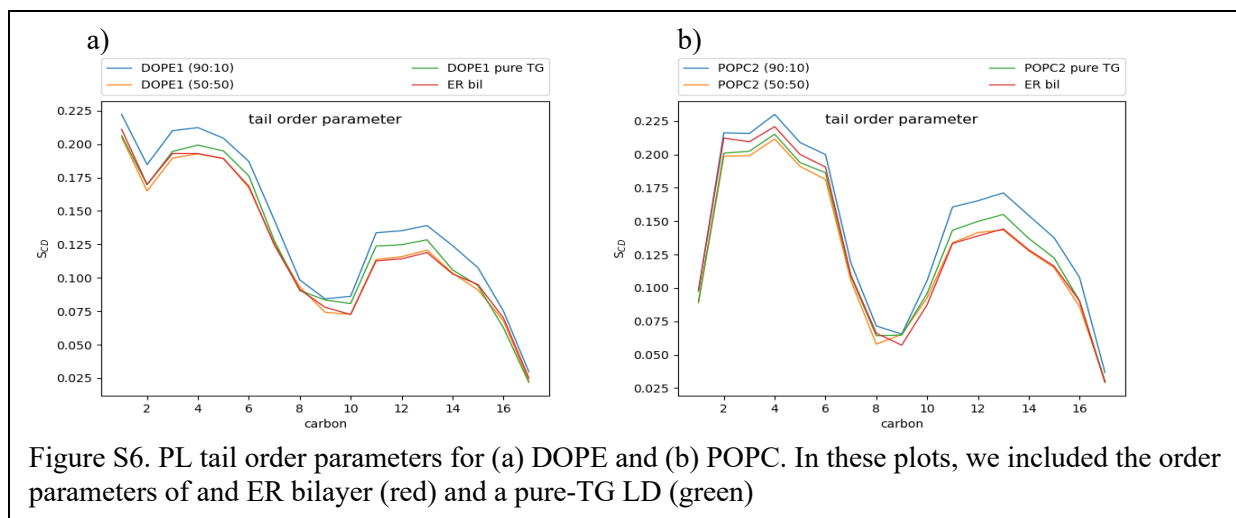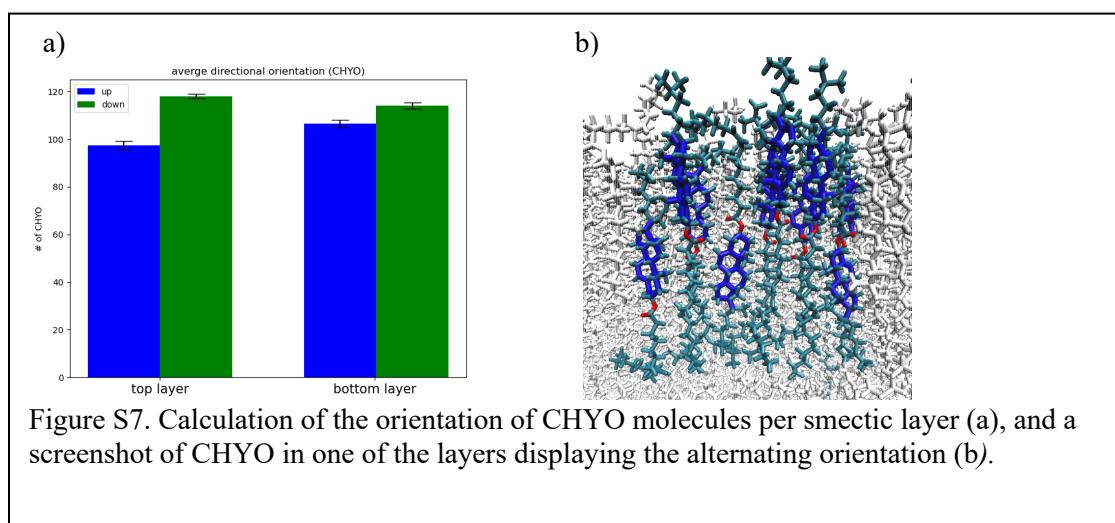

Supplement: s1 [file s1]
